# Supplementary material
Source: PubMed Central journal article supplement (PMC4823011)
Supplement: NIHMS768673-supplement-Supplemental_table_1.pdf [file NIHMS768673-supplement-Supplemental_table_1.pdf]

### Online Supplemental Data

Supplemental Table 1 In vivo transit and disintegration times (minutes) of pH-dependent acrylic co-polymer coated caplets as determined by fluoroscopy.

| Transit time<br>(min)                         | Subject |     |     |     |                 |     |                 |     |     |          | Mean <sup>1</sup> |
|-----------------------------------------------|---------|-----|-----|-----|-----------------|-----|-----------------|-----|-----|----------|-------------------|
|                                               | A       | B   | C   | D   | E               | F   | G               | H   | I   | <i>n</i> |                   |
| Gastric emptying                              | 117     | 301 | 170 | 224 | 200             | 258 | 173             | 194 | 198 | 9        | 204 ± 53          |
| Small intestinal transit                      | 240     | 200 | 259 | 304 | 104             | 200 | 254             | 269 | 201 | 9        | 198 ± 71          |
| Colon arrival                                 | 280     | 501 | 262 | 528 | 304             | 395 | 427             | 463 | 399 | 9        | 402 ± 98          |
| Caplet disintegration initiation <sup>2</sup> | 280     | 501 | 262 | 528 | 304             | 395 | ND <sup>5</sup> | 463 | 399 | 8        | 391 ± 102         |
| Caplet disintegration duration <sup>3</sup>   | 420     | 116 | 494 | 185 | ND <sup>5</sup> | 335 | ND <sup>5</sup> | ND  | 155 | 6        | 266 ± 142         |
| Total caplet transit <sup>4</sup>             | 700     | 616 | 755 | 713 | 690             | 730 | 750             | 700 | 553 | 9        | 451 ± 66          |

<sup>1</sup>Values are expressed as mean ± SD

<sup>2</sup> Time elapsed from caplet ingestion to the first signs of coating erosion.<sup>3</sup>Time elapsed from the first signs of caplet coating erosion to complete disintegration.

<sup>4</sup>Time elapsed from caplet ingestion to complete disintegration or final image.

<sup>5</sup>ND: not detected.
